# Supplementary material for: How significant are the public dimensions of faculty work in review, promotion and tenure documents?
Source: eLife journal article supplement (doi:10.7554/elife.42254), 2019-02-12
Supplement: supp [file elife-42254-supp-v1.zip]

Archive with 1 entries (1 files):
- elife_poa_e42254_Transparent_Reporting_File.pdf
